# Supplementary material
Source: MDPI journal article supplement (https://www.mdpi.com/2071-1050/12/5/1815)
Supplement: s1 [file s1]

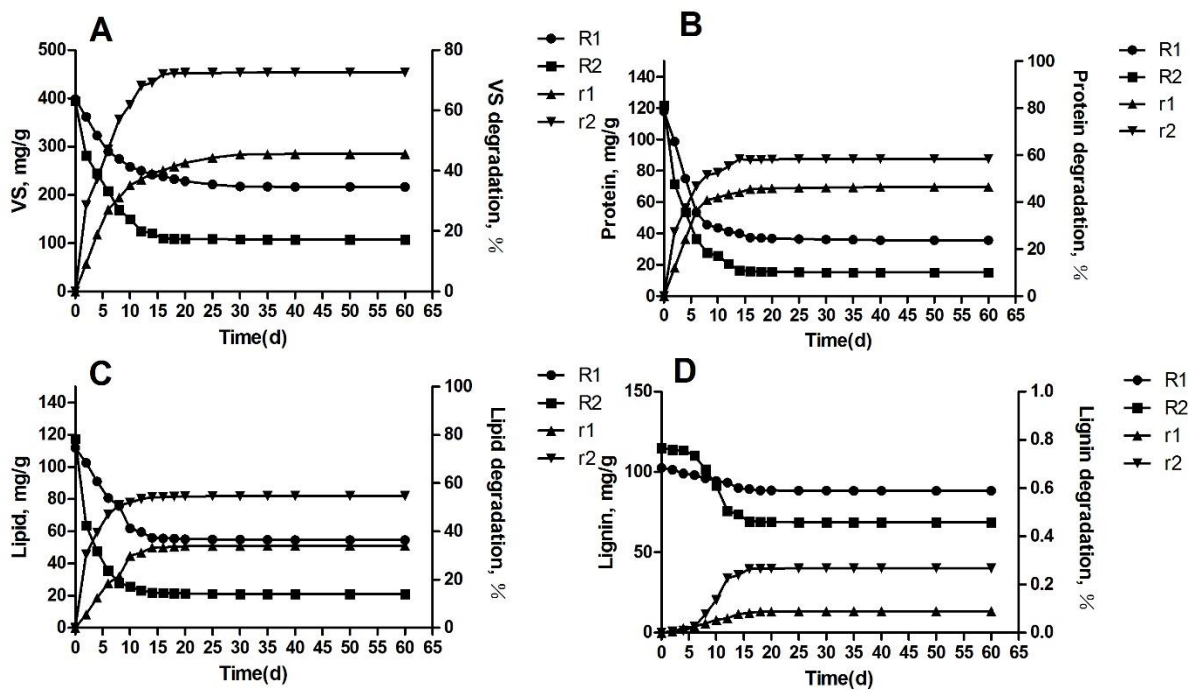

Figure S1. (A)VS, (B)Protein, (C) Lipid and (D) Lignin degradation with time.

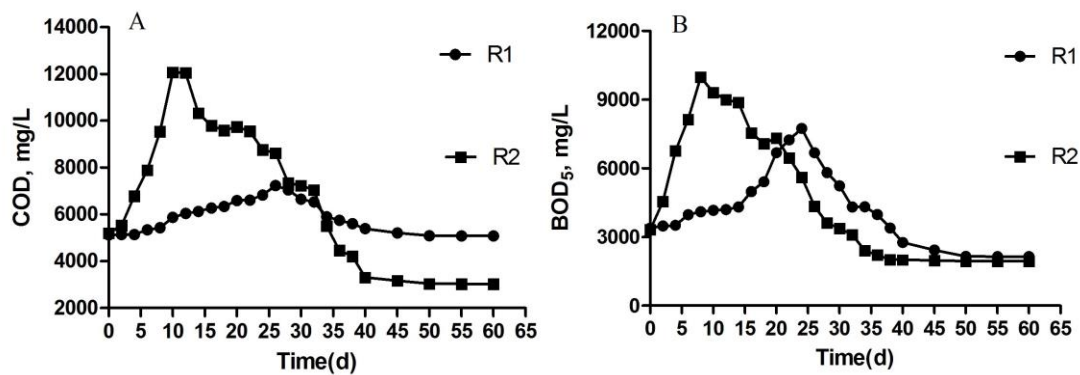

Figure S2. Leachate analysis with time in two bioreactors (A) COD; (B) BOD<sub>5</sub>.
